# Supplementary material for: Insights into the inhibition and mechanism of compounds against LPS-induced PGE2production: a pathway network-based approach and molecular dynamics simulations
Source: Royal Society of Chemistry journal article supplement (doi:10.1039/c4ib00141a), 2014-01-01
Supplement: c4ib00141a1.pdf [file c4ib00141a1.pdf]

## Supplemental information

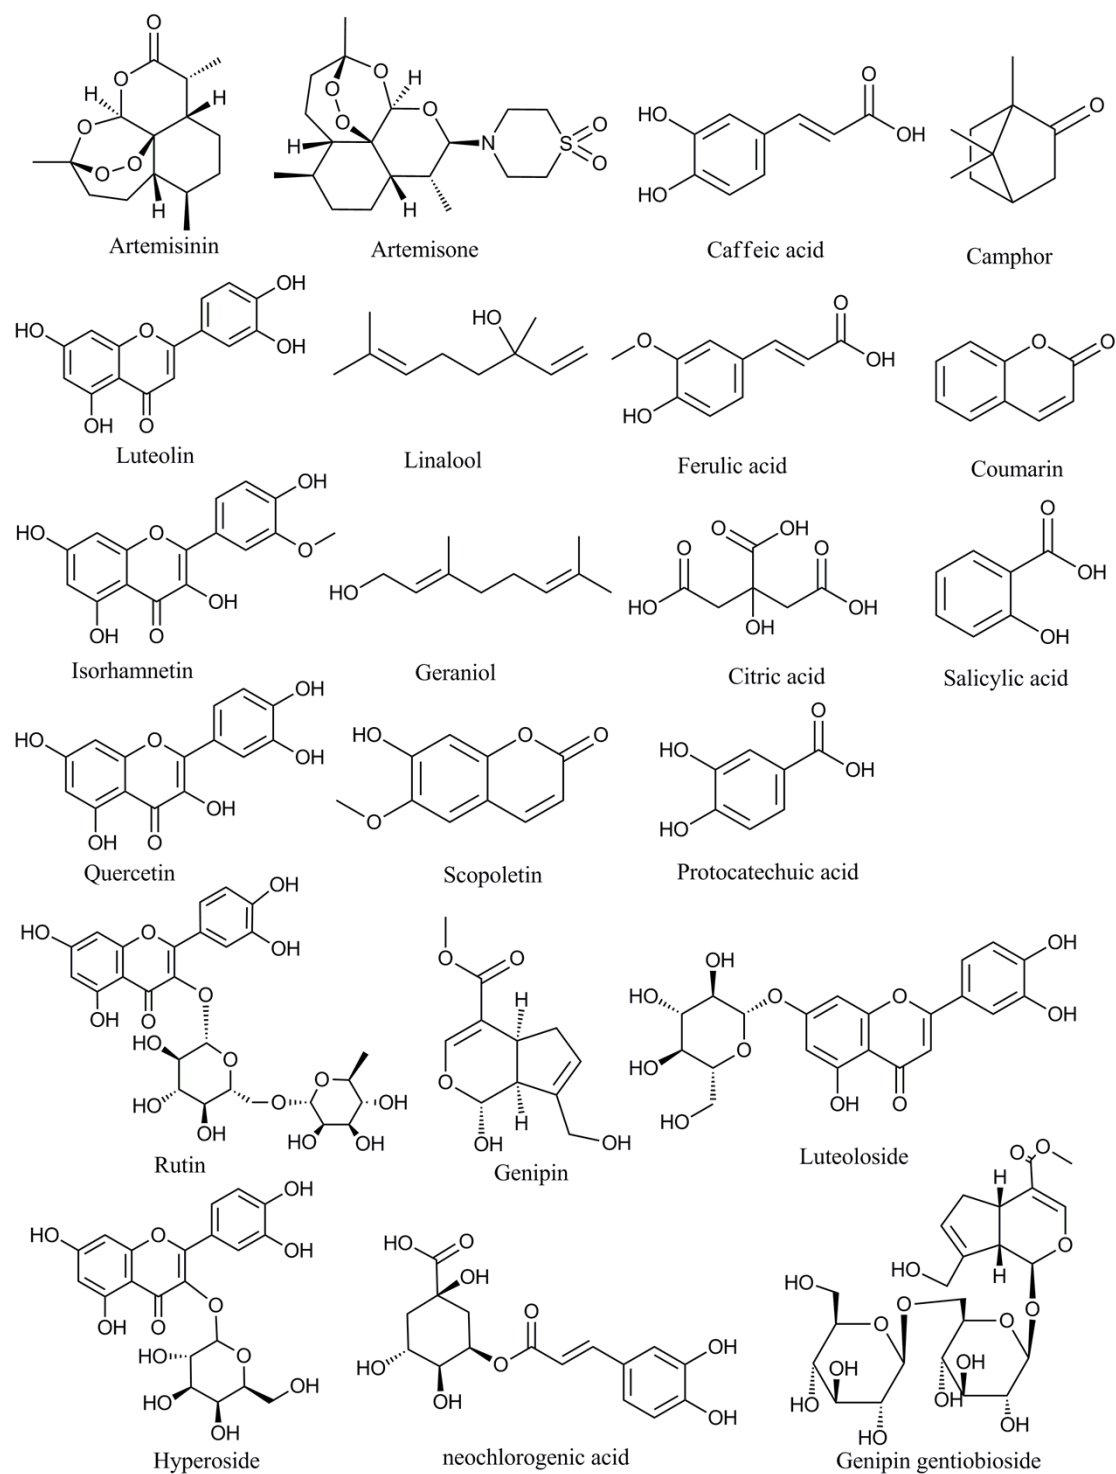

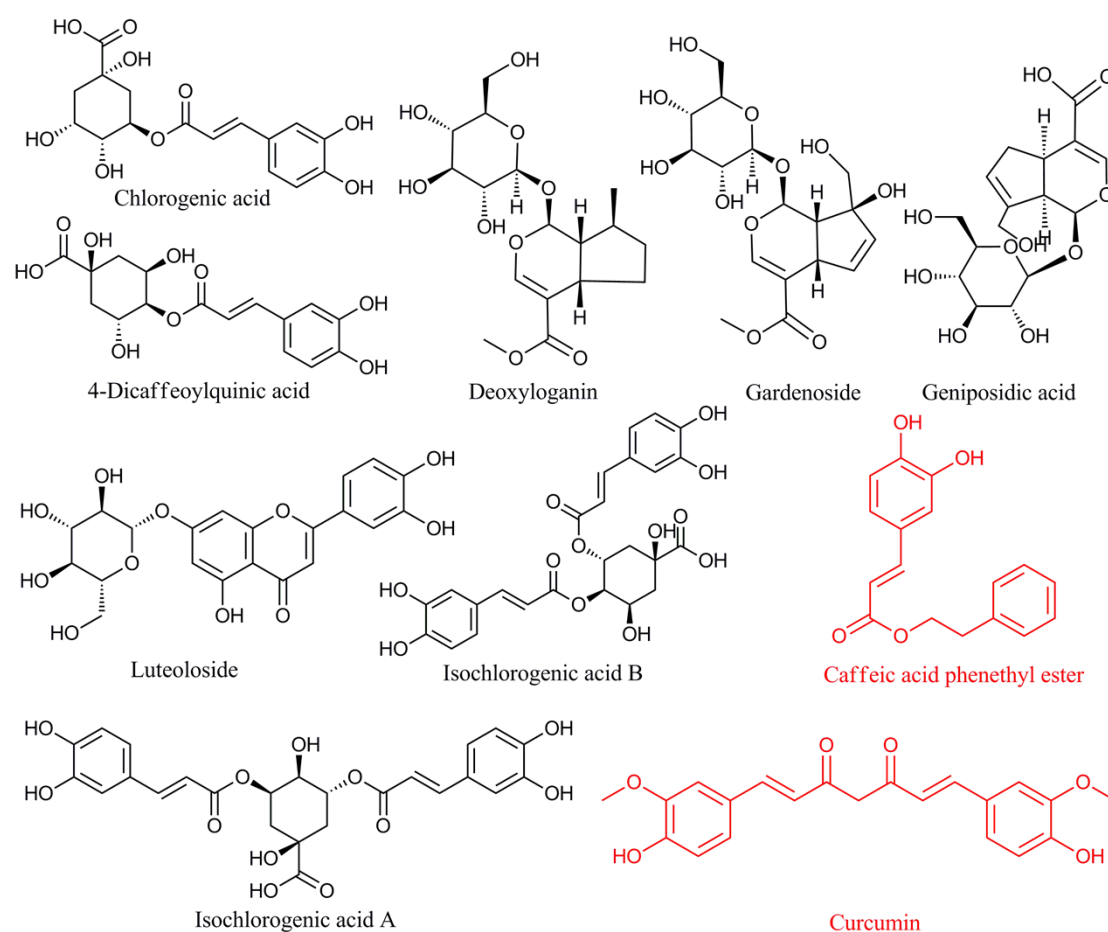

Figure S1. Two dimensional structures of all compounds and two known inhibitor for molecular docking. Caffeic acid phenethyl ester and curcumin were two known inhibitors(Kumar and Bora, 2012; Natarajan, et al., 1996) for AP-1 (PDB ID: 1FOS) and NF-kB (PDB ID: 3GUT). The structure related to Table 1.

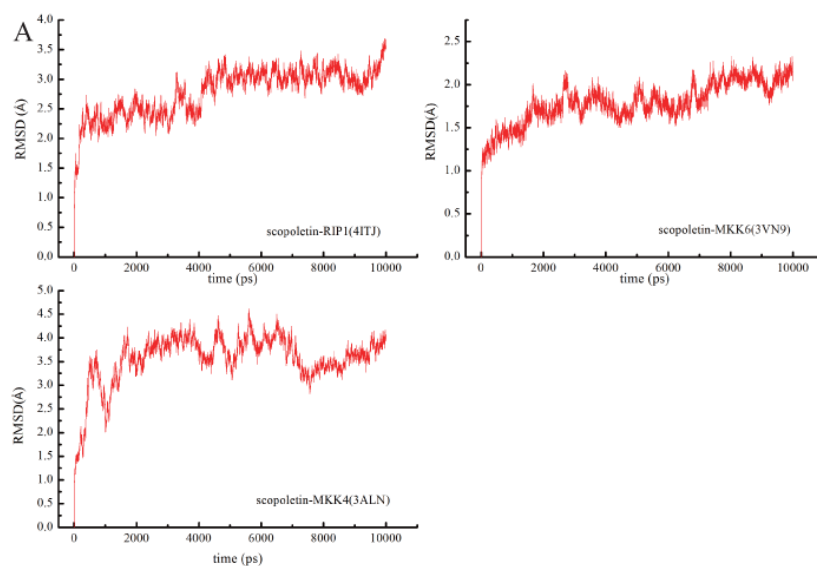

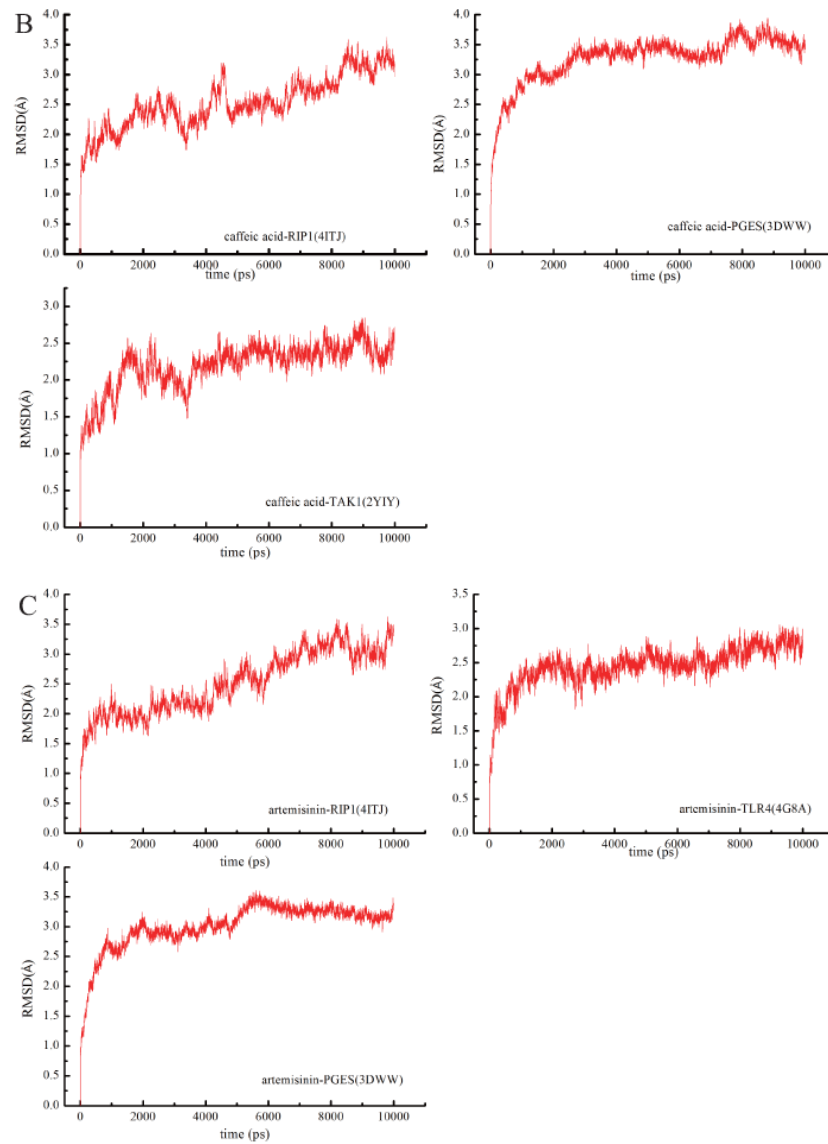

Figure S2. Plots of RMSDs of the top three protein-ligand complexes for most potent compounds during 10 ns of MD simulations. (A) three proteins and scopoletin complex, (B) three proteins and caffeic acid, (C) three proteins and artemisinin.

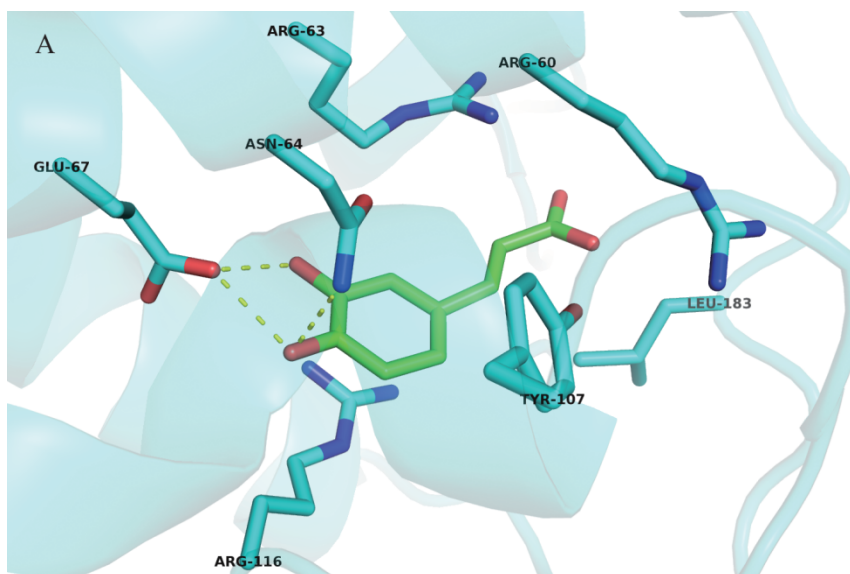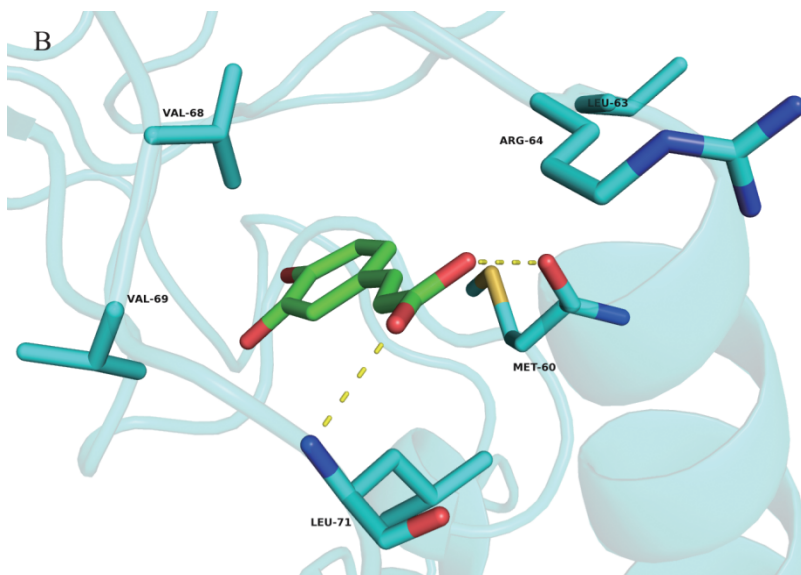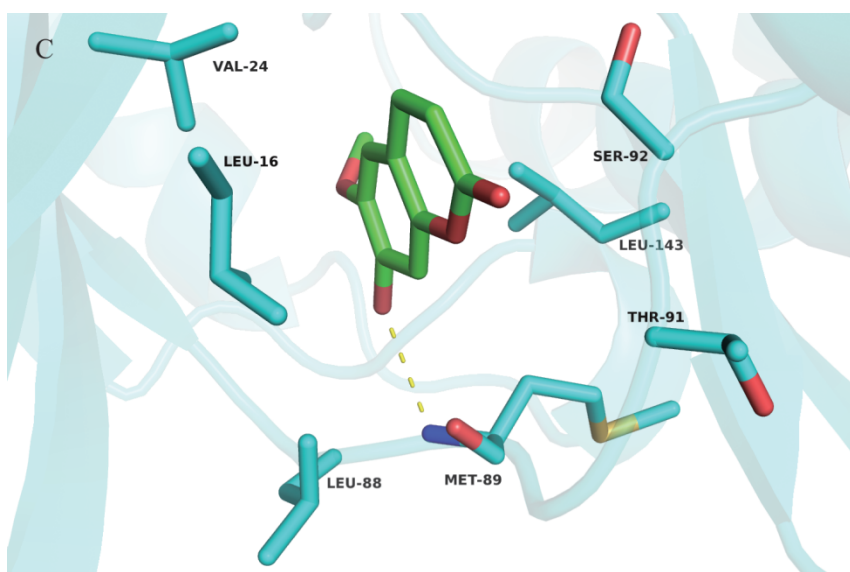

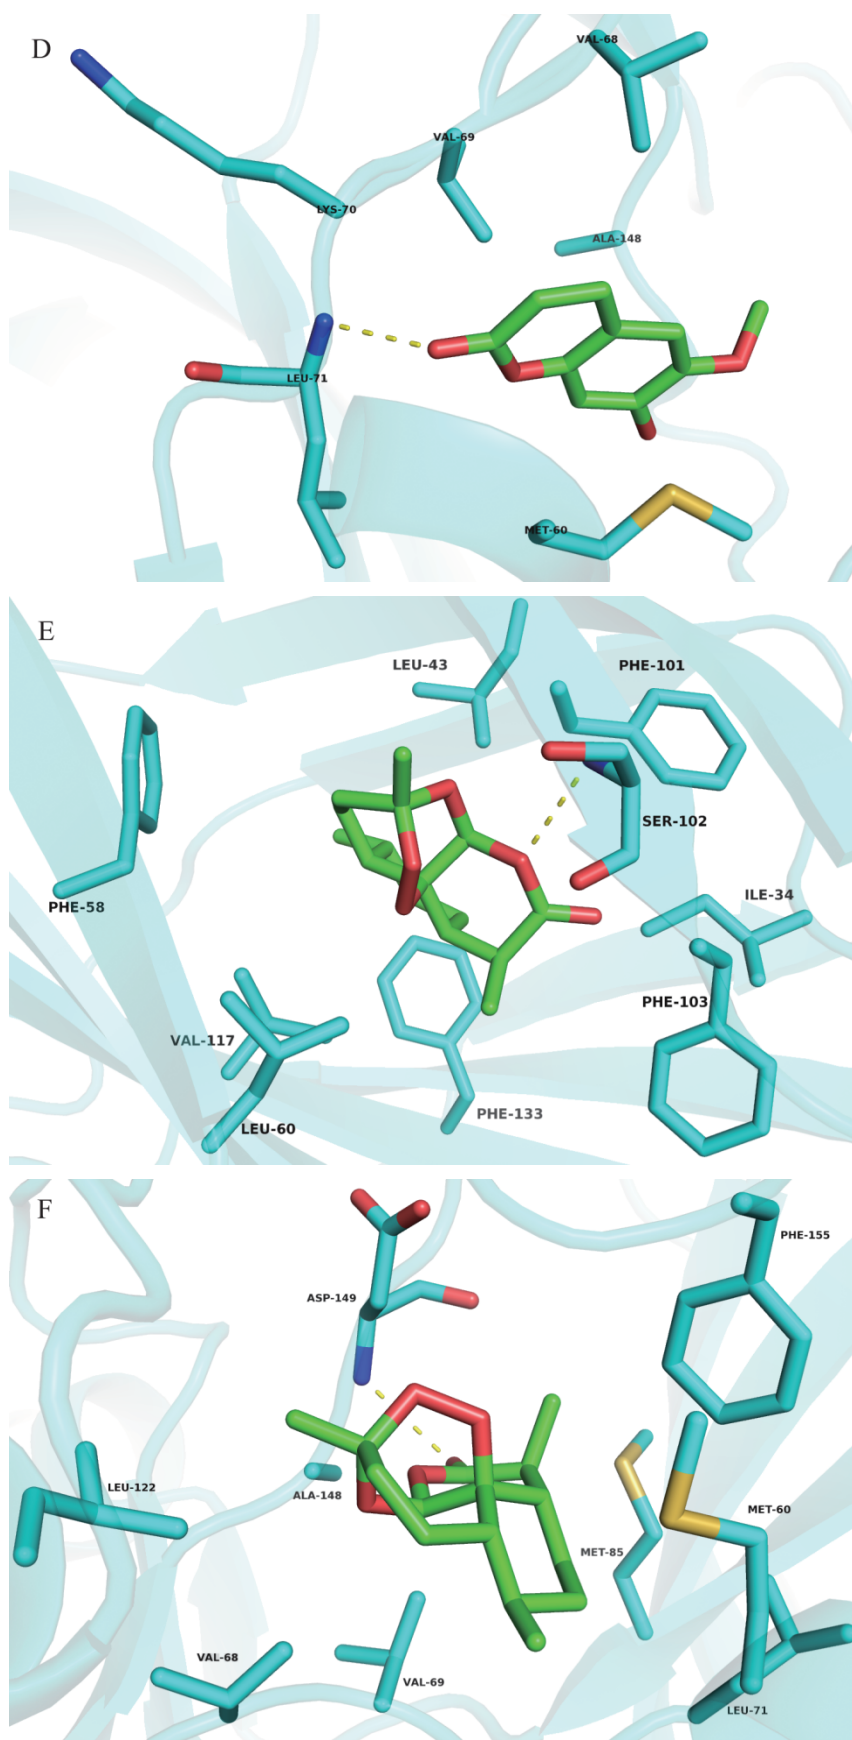

Figure S3. The binding modes of potent compounds with top target proteins after 10

ns MD simulations. (A) complex caffeic acid/PGES (3DWW), (B) complex caffeic acid/RIP1 (4ITJ), (C) complex scopoletin/MKK6 (3VN9), (D) complex scopoletin/RIP1 (4ITJ), (E) complex artemisinin/TLR4 (4G8A), (F) complex artemisinin/RIP1 (4ITJ) Ligands and some important residues are shown in stick, and hydrogen bonds are shown in dashed line (yellow).
